# Supplementary material
Source: HighWire-hosted journal article supplement (https://ijssurgery.com/content/8724)
Supplement: inline-supplementary-material-1 [file inline-supplementary-material-1.docx]

| **Code Description** | **Code** |
| --- | --- |
| Posterior Arthrodesis | CPT-22800, CPT-22802, CPT-22804 |
| Anterior Arthrodesis | CPT-22808, CPT-22810, CPT-22812 |
| Diabetes | ICD-9-D-25000, ICD-9-D-25001, ICD-9-D-25002, ICD-9-D-25003, ICD-10-D-E100, ICD-10-D-E101, ICD-10-D-E106 ICD-10-D-E108, ICD-10-D-E109, ICD-10-D-E110, ICD-10-D-E111, ICD-10-D-E116, ICD-10-D-E118, ICD-10-D-E119, ICD-10-D-E120, ICD-10-D-E121 ICD-10-D-E126, ICD-10-D-E128, ICD-10- D-E129, ICD-10-D-E130, ICD-10-D-E131, ICD-10-D-E136, ICD-10-D-E138, ICD-10-D-E139, ICD-10-D-E140, ICD-10-D-E141, ICD-10-D-E146, ICD-10-D-E148, ICD-10-D-E149, ICD-10-D-E102, ICD-10-D-E103, ICD-10-D-E104, ICD-10-D-E105, ICD-10-D-E107, ICD-10-D-E112, ICD-10-D-E113, ICD-10-D-E114, ICD-10-D-E115, ICD-10-D-E117, ICD-10-D-E122, ICD-10-D-E123, ICD-10-D-E124, ICD-10-D-E125, ICD-10-D-E127, ICD-10-D-E132, ICD-10-D-E133, ICD-10-D-E134, ICD-10-D-E135, ICD-10-D-E137, ICD-10-D-E142, ICD-10-D-E143, ICD-10-D-E144, ICD-10-D-E145, ICD-10-D-E147 |
| Obesity | ICD-9-D-27800, ICD-9-D-27801, ICD-10-D-DE66 ICD-10-D-E660 ICD-10-D-E660B ICD-10-D-E660C ICD-10-D-E660E ICD-10-D-E660F ICD-10-D-E660G ICD-10-D-E660H ICD-10-D-E661, ICD-10-D-E662, ICD-10-D-E662A ICD-10-D-E668 ICD-10-D-E669 |
| CAD | ICD-9-D-41400, ICD-9-D-41401, ICD-9-D-41402, ICD-9-D-41403, ICD-9-D-41404, ICD-9-D-41405, ICD-9-D-41406, ICD-9-D-41407, ICD-9-D-41410, ICD-9-D-41411, ICD-9-D-41412, ICD-9-D-41419, ICD-9-D-4142, ICD-9-D-4143, ICD-9-D-4144, ICD-9-D-4148, ICD-9-D-4149, ICD-10-D-I2510, ICD-10-D-I25110, ICD-10-D-I25111, ICD-10-D-I25118, ICD-10-D-I25119, ICD-10-D-I252, ICD-10-D-I253, ICD-10-D-I2541, ICD-10-D-I2542, ICD-10-D-I255, ICD-10-D-I256, ICD-10-D-I25700, ICD-10-D-I25701, ICD-10-D-I25708, ICD-10-D-I25709, ICD-10-D-I25710, ICD-10-D-I25711, ICD-10-D-I25718, ICD-10-D-I25719, ICD-10-D-I25720, ICD-10-D-I25721, ICD-10-D-I25728, ICD-10-D-I25729, ICD-10-D-I25730, ICD-10-D-I25731, ICD-10-D-I25738, ICD-10-D-I25739, ICD-10-D-I25750, ICD-10-D-I25751, ICD-10-D-I25758, ICD-10-D-I25759, ICD-10-D-I25760, ICD-10-D-I25761, ICD-10-D-I25768, ICD-10-D-I25769, ICD-10-D-I25790, ICD-10-D-I25791, ICD-10-D-I25798, ICD-10-D-I25799, ICD-10-D-I25810, ICD-10-D-I25811, ICD-10-D-I25812, ICD-10-D-12582, ICD-10-D-I2583, ICD-10-D-I2584, ICD-10-D-I2589, ICD-10-D-I259 |
| Rheumatoid Arthritis | ICD-9-D-7140 ICD-10-D-M0500, ICD-10-D-M05011, ICD-10-D-M05012, ICD-10-D-M05019, ICD-10-D-M05021, ICD-10-D-M05022, ICD-10-D-M05029, ICD-10-D-M05031, ICD-10-D-M05032, ICD-10-D-M05039, ICD-10-D-M05041, ICD-10-D-M05042, ICD-10-D-M05049, ICD-10-D-M05051, ICD-10-D-M05052, ICD-10-D-M05059, ICD-10-D-M05061, ICD-10-D-M05062, ICD-10-D-M05069, ICD-10-D-M05071, ICD-10-D-M05072, ICD-10-D-M05079, ICD-10-D-M0509, ICD-10-D-M0510, ICD-10-D-M05111, ICD-10-D-M05112, ICD-10-D-M05119, ICD-10-D-M05121, ICD-10-D-M05122, ICD-10-D-M05129, ICD-10-D-M05131, ICD-10-D-M05132, ICD-10-D-M05139, ICD-10-D-M05141, ICD-10-D-M05142, ICD-10-D-M05149, ICD-10-D-M05151, ICD-10-D-M05152, ICD-10-D-M05159, ICD-10-D-M05161, ICD-10-D-M05162, ICD-10-D-M05169, ICD-10-D-M05171, ICD-10-D-M05172, ICD-10-D-M05179, ICD-10-D-M0519, ICD-10-D-M0520, ICD-10-D-M05211, ICD-10-D-M05212, ICD-10-D-M05219, ICD-10-D-M05221, ICD-10-D-M05222, ICD-10-D-M05229, ICD-10-D-M05231, ICD-10-D-M05239, ICD-10-D-M05241, ICD-10-D-M05242, ICD-10-D-M05249, ICD-10-D-M05251, ICD-10-D-M05252, ICD-10-D-M05259, ICD-10-D-M05261, ICD-10-D-M05262, ICD-10-D-M05269, ICD-10-D-M05271, ICD-10-D-M05272, ICD-10-D-M05279, ICD-10-D-M0530, ICD-10-D-M05311, ICD-10-D-M05312, ICD-10-D-M05319, ICD-10-D-M05321, ICD-10-D-M05322, ICD-10-D-M05329, ICD-10-D-M05331, ICD-10-D-M05332, ICD-10-D-M05339, ICD-10-D-M05341, ICD-10-D-M05342, ICD-10-D-M05349, ICD-10-D-M05351, ICD-10-D-M05352, ICD-10-D-M05359, ICD-10-D-M05361, ICD-10-D-M05362, ICD-10-D-M05369, ICD-10-D-M05371, ICD-10-D-M05372, ICD-10-D-M05379, ICD-10-D-M0539, ICD-10-D-M0540, ICD-10-D-M05411, ICD-10-D-M05412, ICD-10-D-M05419, ICD-10-D-M05421, ICD-10-D-M05422, ICD-10-D-M05429, ICD-10-D-M05431, ICD-10-D-M05432, ICD-10-D-M05439, ICD-10-D-M05441, ICD-10-D-M05442, ICD-10-D-M05449, ICD-10-D-M05451, ICD-10-D-M05452, ICD-10-D-M05459, ICD-10-D-M05461, ICD-10-D-M05462, ICD-10-D-M05469, ICD-10-D-M05471, ICD-10-D-M05472, ICD-10-D-M05479, ICD-10-D-M0549, ICD-10-D-M0550, ICD-10-D-M0551, ICD-10-D-M0552, ICD-10-D-M0559, ICD-10-D-M0561, ICD-10-D-M0562, ICD-10-D-M0569, ICD-10-D-M0571, ICD-10-D-M0572, ICD-10-D-M0579, ICD-10-D-M059, ICD-10-D-M0560, ICD-10-D-M05611, ICD-10-D-M05612, ICD-10-D-M05619, ICD-10-D-M05621, ICD-10-D-M05622, ICD-10-D-M05629, ICD-10-D-M05631, ICD-10-D-M05632, ICD-10-D-M05639, ICD-10-D-M05641, ICD-10-D-M05642, ICD-10-D-M05649, ICD-10-D-M05651, ICD-10-D-M05652, ICD-10-D-M05659, ICD-10-D-M05661, ICD-10-D-M05669, ICD-10-D-M05671, ICD-10-D-M05672, ICD-10-D-M05679, ICD-10-D-M0569, ICD-10-D-M0570, ICD-10-D-M05711, ICD-10-D-M05712, ICD-10-D-M05719, ICD-10-D-M05721, ICD-10-D-M05722, ICD-10-D-M05729, ICD-10-D-M05731, ICD-10-D-M05732, ICD-10-D-M05739, ICD-10-D-M05741, ICD-10-D-M05742, ICD-10-D-M05749, ICD-10-D-M05751, ICD-10-D-M05752, ICD-10-D-M05759, ICD-10-D-M05761, ICD-10-D-M05762, ICD-10-D-M05769, ICD-10-D-M05771, ICD-10-D-M05772, ICD-10-D-M05779, ICD-10-D-M0579, ICD-10-D-M057A, ICD-10-D-M0580, ICD-10-D-M05811, ICD-10-D-M05812, ICD-10-D- M05819, ICD-10-D-M05821, ICD-10-D-M05822, ICD-10-D-M05829, ICD-10-D-M05831, ICD-10-D-M05832, ICD-10-D-M05839, ICD-10-D-M05841, ICD-10-D-M05842, ICD-10-D-M05849, ICD-10-D-M05851, ICD-10-D-M05852, ICD-10-D-M05859, ICD-10-D-M05861, ICD-10-D-M05862, ICD-10-D-M05869, ICD-10-D-M05871, ICD-10-D-M05872, ICD-10-D-M05879, ICD-10-D-M0589, ICD-10-D-M058A, ICD-10-D-M059, ICD-10-D-M450, ICD-10-D-M451, ICD-10-D-M452, ICD-10-D-M453, ICD-10-D-M454, ICD-10-D-M455, ICD-10-D-M456, ICD-10-D-M457, ICD-10-D-M458, ICD-10-D-M459 |
| UTI | ICD-9-D-5990, ICD-9-D-99664, ICD-9-D-5950, ICD-9-D-59581, ICD-9-D-59589, ICD-9-D-5959, ICD-9-D-09940, ICD-9-D-09949, ICD-10-D-N390, ICD-10-D-N99521, ICD-10-D-N99531, ICD-10-D-T83518A, ICD-10-D-T83518D, ICD-10-D-T83518S, ICD-10-D-N3000, ICD-10-D-N3001, ICD-10-D-N3080, ICD-10-D-N3081, ICD-10-D-N3090, ICD-10-D-N3091 |

**Supplemental Table 1.** ICD-9, ICD-10, and CPT codes and descriptions used to query the PearlDiver database.
